# Supplementary material for: Retinal Delivery of the Protein Kinase C-β Inhibitor Ruboxistaurin Using Non-Invasive Nanoparticles of Polyamidoamine Dendrimers
Source: MDPI journal article supplement (doi:10.3390/pharmaceutics14071444), 2022-07-11
Supplement: s1 [file s1]

### Supplementary materials

**Table S1.** Different storage conditions used to assess the stability of G4.5 and G5 complexes.

| Nanoformulation    | Condition   | Temperature (°C) |
|--------------------|-------------|------------------|
| G4.5 or G5 complex | At daylight | 4                |
|                    | In the dark |                  |
|                    | At daylight | 25               |
|                    | In the dark |                  |
|                    | At daylight | 37               |
|                    | In the dark |                  |
|                    | At daylight | 50               |
|                    | In the dark |                  |

**Table S2.** Effect of heat and light on the stability of G4.5 complex 25:1.

| Nanoparticles     | Condition   | Temperature (°C) | Color change | Precipitation | Turbidity |
|-------------------|-------------|------------------|--------------|---------------|-----------|
| G4.5 complex 25:1 | At daylight | 4                | -            | -             | -         |
|                   | In the dark |                  | -            | -             | -         |
|                   | At daylight | 25               | √            | -             | -         |
|                   | In the dark |                  | -            | -             | -         |
|                   | At daylight | 37               | -            | √             | -         |
|                   | In the dark |                  | -            | √             | -         |
|                   | At daylight | 50               | √            | -             | -         |
|                   | In the dark |                  | √            | -             | -         |

**Table S3.** Effect of heat and light on the stability of G5 complex 25:1.

| Nanoparticles   | Condition   | Temperature (°C) | Color Change | Precipitation | Turbidity |
|-----------------|-------------|------------------|--------------|---------------|-----------|
| G5 complex 25:1 | At daylight | 4                | -            | -             | -         |
|                 | In the dark |                  | -            | -             | -         |
|                 | At daylight | 25               | √            | -             | -         |
|                 | In the dark |                  | -            | -             | -         |
|                 | At daylight | 37               | -            | √             | -         |
|                 | In the dark |                  | -            | √             | -         |
|                 | At daylight | 50               | √            | √             | -         |
|                 | In the dark |                  | √            | -             | -         |

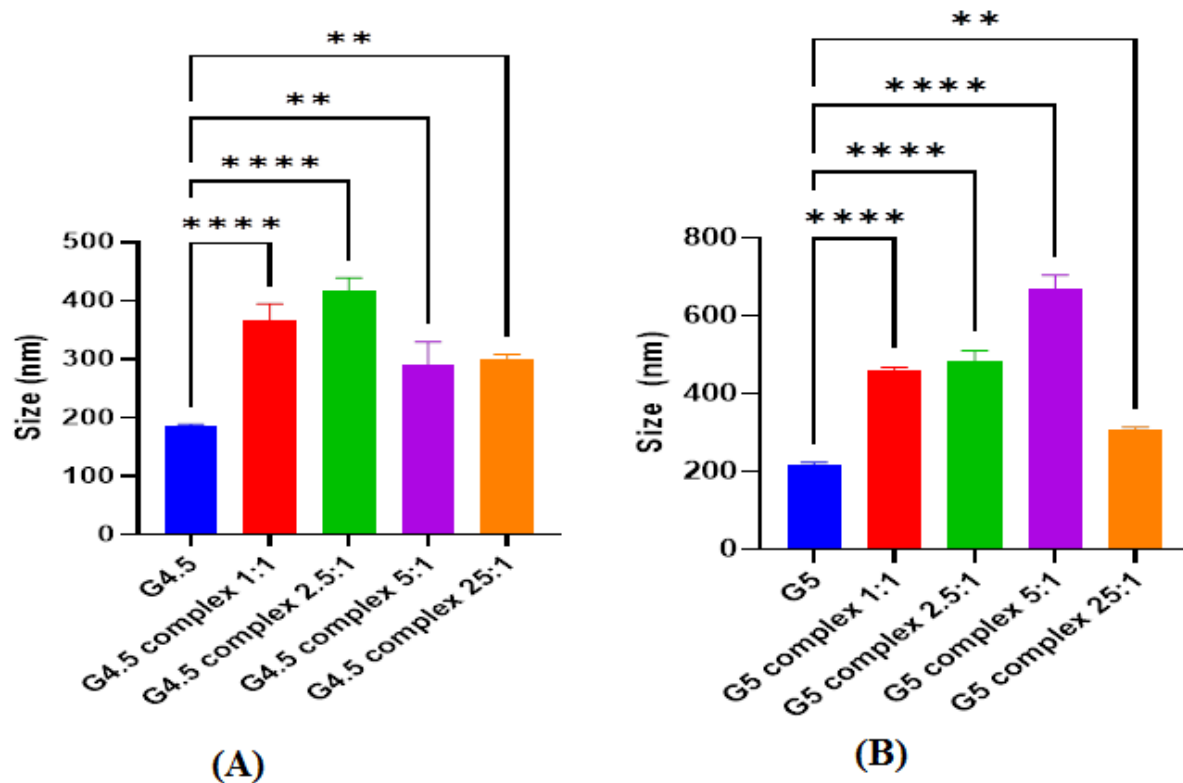

**Figure S1.** Particle size (PS) of (A) G4.5 and (B) G5 complexes along with the empty PAMAM dendrimers G4.5 and G5 (mean  $\pm$  SD,  $n = 3$ ; ANOVA, \*\*  $p \leq 0.01$ , \*\*\*\*  $p \leq 0.0001$ ).

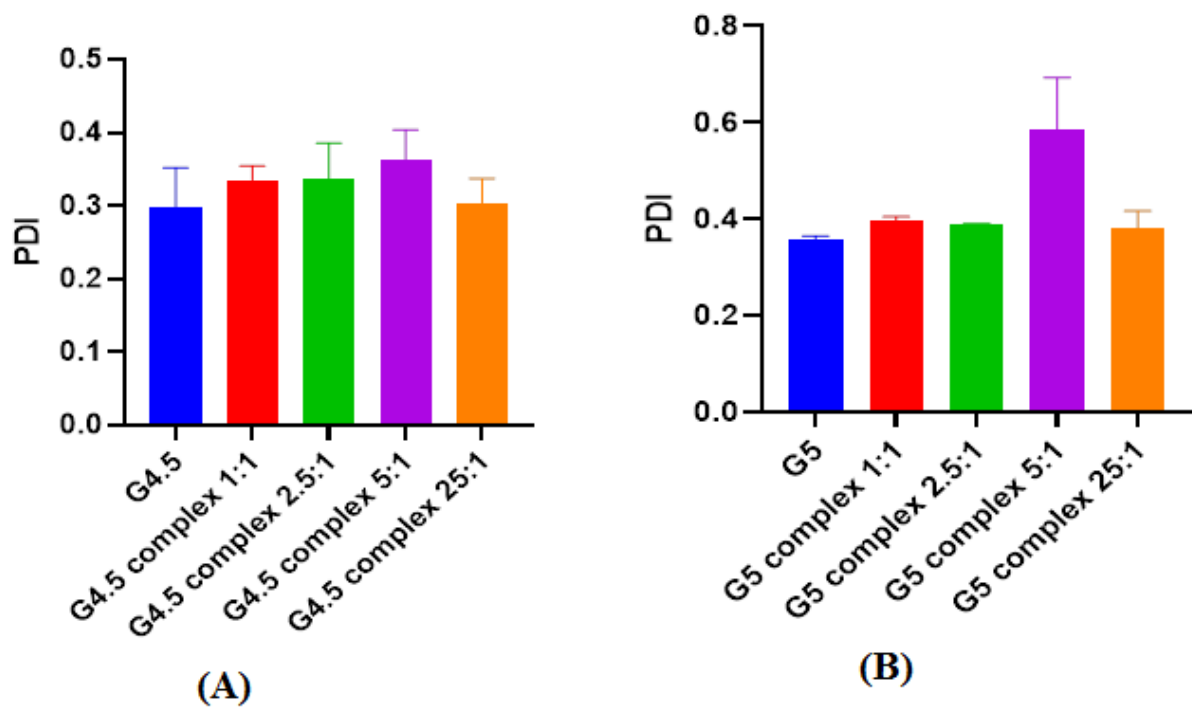

**Figure S2.** Polydispersity index (PDI) of (A) G4.5 complexes and (B) G5 complexes along with the empty PAMAM dendrimers G4.5 and G5 (mean  $\pm$  SD,  $n = 3$ ).

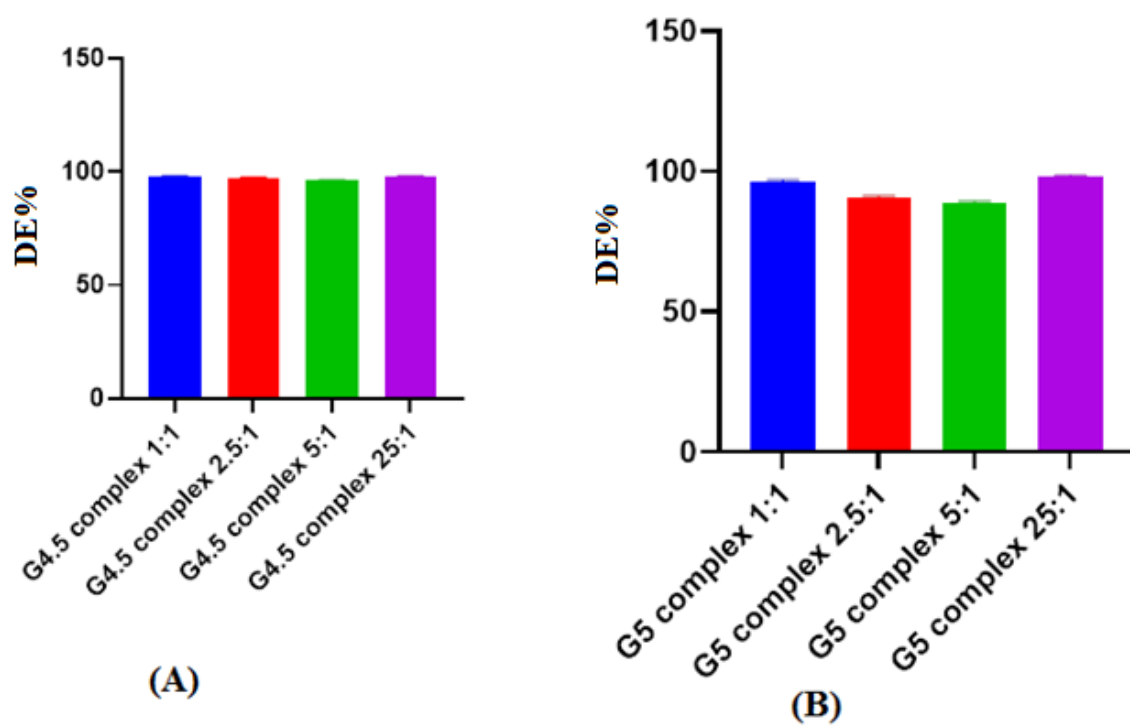

**Figure S3.** Drug loading efficiency (DE%) of (A) G4.5 complexes and (B) G5 complexes (mean  $\pm$  SD,  $n = 3$ ).

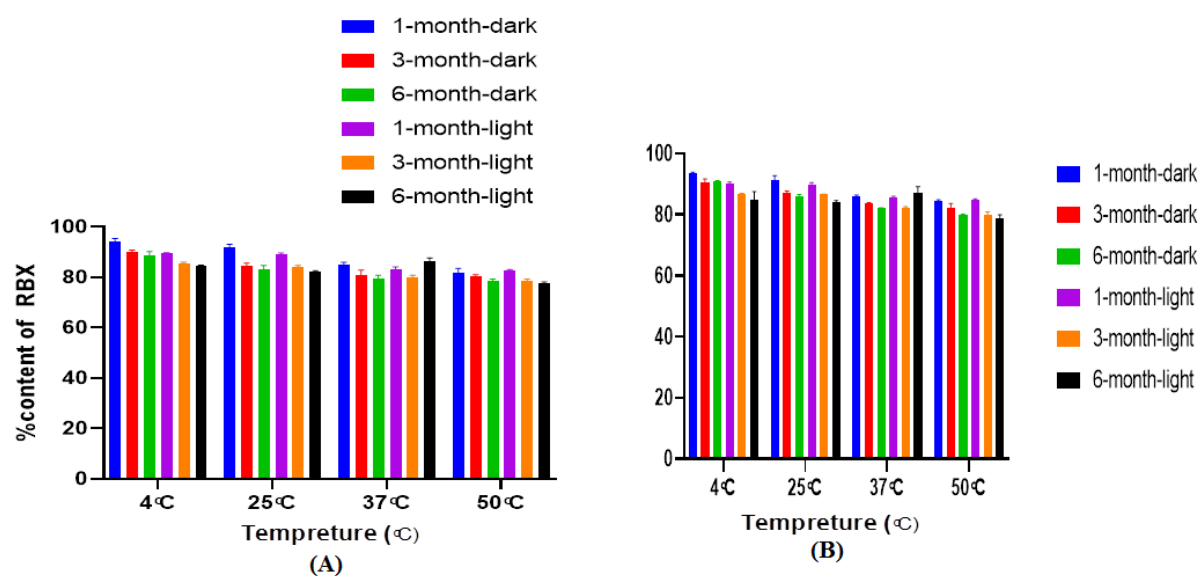

**Figure S4.** Stability studies of RBX in **(A)** G4.5 complexes and **(B)** G5 complexes under different storage conditions (mean  $\pm$  SD,  $n = 3$ ).
